1 **Profiling the size-dependent heterogeneity of membrane proteins in a**  
2 **mixed population of small extracellular vesicle for potential cancer**  
3 **diagnosis**

4

5

6 Chunhui Zhai<sup>1</sup>, Feng Xie<sup>1</sup>, Qiang Zeng<sup>1</sup>, Weiqiang Zheng<sup>2</sup>, Jingan Wang<sup>1</sup>, Haiyan  
7 Hu<sup>3</sup>, Yuting Yang<sup>2,\*</sup>, Xianting Ding<sup>1,\*</sup>, Hui Yu<sup>1,4,\*</sup>

8

9 <sup>1</sup> Institute for Personalized Medicine, School of Biomedical Engineering, Shanghai  
10 Jiao Tong University, Shanghai, 200030, People's Republic of China.

11 <sup>2</sup> Department of Instrument Science and Engineering, School of Electronic  
12 Information and Electrical Engineering, Shanghai Jiao Tong University, Shanghai,  
13 200030, People's Republic of China.

14 <sup>3</sup> Oncology Department of Shanghai Jiao Tong University Affiliated Sixth People's  
15 Hospital  
16 Shanghai, 200233, People's Republic of China.

17 <sup>4</sup> Institute of Medical Robotics, Shanghai Jiao Tong University, Shanghai, 200030,  
18 People's Republic of China.

19

20 \*Corresponding author. E-mail: [hui.yu@sjtu.edu.cn](mailto:hui.yu@sjtu.edu.cn) (Prof. Hui Yu);  
21 [yuting.bme@sjtu.edu.cn](mailto:yuting.bme@sjtu.edu.cn) (Prof. Yuting Yang); [dingxianting@sjtu.edu.cn](mailto:dingxianting@sjtu.edu.cn) (Prof.  
22 Xianting Ding)

23

24 **Abstract**

25

26 The heterogeneity in small extracellular vesicles (small EVs) introduces an extra level  
27 of complexity in small EV-based liquid biopsy for cancer diagnosis. Heterogeneous  
28 membrane protein expression is correlated with sizes of small EVs, but accessing this  
29 correlative information is limited by the precise isolation of size-dependent  
30 subpopulations. Herein, we present a single EV enumeration (SEVEN) approach to  
31 profile protein heterogeneity in size-dependent subpopulations, and demonstrate its  
32 potential in improving the accuracy of cancer diagnosis. The interferometric plasmonic  
33 microscopy (iPM) capable of imaging single biological nanoparticles with the diameter  
34 down to 30 nm is employed to detect small EVs at the single-particle level. Small EVs  
35 population with mixed sizes are directly imaged, individually sized and digitally

36 counted during their binding onto different aptamer-coated iPM sensor surfaces. The  
37 protein expression levels and binding kinetics of three size-dependent subpopulations  
38 are analyzed, forming a multidimensional data matrix for cancer diagnosis. Using small  
39 EVs derived from different cancer cell lines, highly heterogeneous protein profiles are  
40 recorded in the three subpopulations. We further demonstrate that the cancer  
41 classification accuracy could be greatly improved by including the subpopulation level  
42 heterogeneous protein profiles as compared with conventional ensemble measurement.

43

## 44 **MAIN TEXT**

45

### 46 **Introduction**

47 Extracellular vesicles (EV) are a group of membrane-enclosed phospholipid vesicles  
48 secreted by mammalian cells, including normal cells as well as cancer cells<sup>1</sup>. Small EV  
49 (sEV), including exosomes and a portion of microvesicles, is a unique subset with a  
50 diameter of less than 200 nm<sup>2</sup>. EVs, including sEV, are packaged with functional  
51 molecules (i.e. proteins, amino acids and nucleic acids) of their parental cells, and play  
52 an important role in cell-cell communication<sup>3</sup>, immune response<sup>4</sup> and cancer  
53 metastasis<sup>5</sup> <sup>6</sup>. sEV are highly heterogeneous in the membrane proteins, sizes and  
54 contents depending on the cell sources, cancer-gene mutation and other environmental  
55 factors<sup>7</sup> <sup>8</sup> <sup>9</sup>, making them a potential tool in cancer diagnosis<sup>10</sup> <sup>11</sup>. For example, by  
56 profiling the expression level of membrane proteins from sEV, early diagnosis of breast  
57 cancer<sup>12</sup> <sup>13</sup> and classification of cancer types<sup>14</sup> have been demonstrated.

58 With sophisticated isolation techniques, size-dependent subsets of sEV including  
59 exomere (<50 nm), Exo-S (60 - 80 nm) and Exo-L (90 - 120 nm) were identified with  
60 unique molecular biomarker profiles<sup>15</sup>. This suggests that conventional analytical  
61 approaches by measuring average information from the full population of sEV would  
62 inevitably suffer from the large background noise from irrelevant subpopulations<sup>16</sup>.  
63 Profiling protein heterogeneity of the size-dependent sEV subpopulations would thus  
64 largely advance our knowledge in the mechanism of their biological functions, as well  
65 as the development of accurate diagnostic tools<sup>8</sup>. However, the major challenge to  
66 access the heterogeneity information is the difficulties in precisely isolation of sEV  
67 subpopulations with specific sizes. Although there are several emerging techniques for

68 isolation of sEV subpopulations<sup>15 17 18 19 20 21 22</sup>, they typically suffer from poor  
69 efficiency, time consuming process, and sophisticated fabrication<sup>23</sup>.

70 Herein, we present an alternative approach termed single EV enumeration (SEVEN)  
71 to profiling the protein heterogeneity in size-dependent subsets of small EVs for cancer  
72 diagnosis. Instead of profiling proteins on isolated size-dependent subsets in the  
73 conventional approaches, SEVEN accurately sizes single small EVs captured by  
74 different aptamers to access the heterogeneity information. Using small EVs derived  
75 from five different cancer cell lines, we measured the heterogeneous expression of five  
76 different membrane proteins on three small EVs' subsets, and developed a machine  
77 learning algorithm for cancer classification.

78

## 79 **Results and Discussions**

80

### 81 **The overview of SEVEN.**

82 The principle of SEVEN is based on our previous work to image, size and digitally  
83 count single sEV by the interferometric plasmonic microscopy (iPM)<sup>24 25</sup> (**Figure 1**).  
84 For each protein biomarker detection, SEVEN dynamically measures the size of each  
85 sEV particle specifically binding onto an aptamer-coated sensor surface (**Table S1**),  
86 and divides them into size-dependent subpopulations. Corresponding size-dependent  
87 binding curves are then constructed by digital counting of sEV, from which parameters  
88 including the maximum binding number and the exponential coefficient are quantified.  
89 For sEV from different cell sources measured on different aptamer-coated sensor  
90 surfaces, these parameters form a multidimensional matrix containing size-dependent  
91 heterogeneous information of protein biomarkers.

92

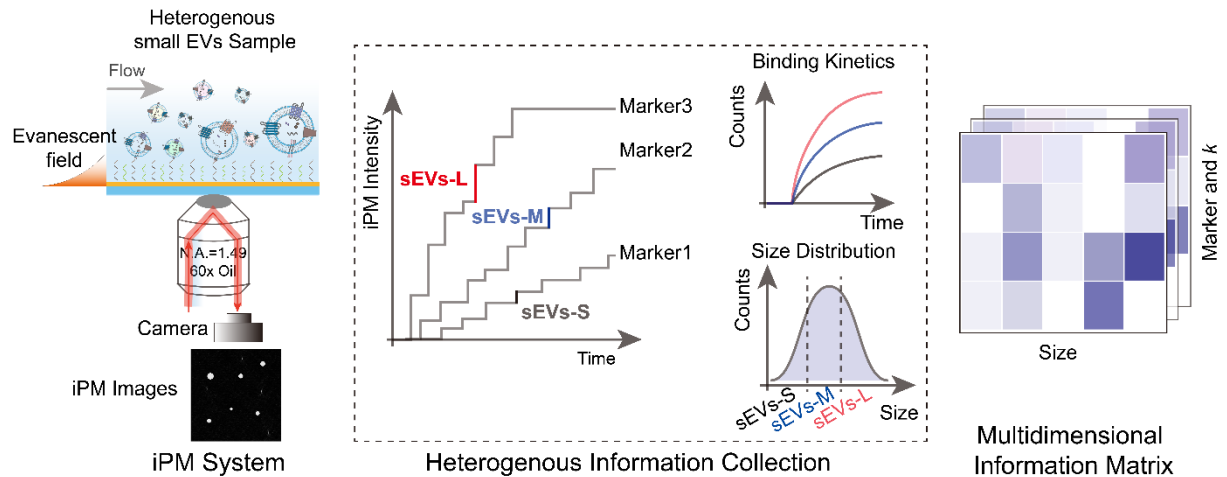

**Figure 1. The schematics.** Binding of sEV onto specific aptamer-coated sensors is imaged with the iPM system; image intensity and counts are analyzed to construct binding curves of each subpopulation (sEV-L, sEV-M and sEV-S); a matrix is formed with the sizes, counts and kinetics.

### 100 Verification of sEV sample.

101 Five different cell lines, including A549 (lung cancer), HepG2 (liver cancer), MCF-7  
102 (breast cancer), LNCaP (prostatic cancer) and L-02 (normal liver cells), were cultured  
103 to derive sEV. sEV were isolated from the culture medium using ultracentrifugation  
104 methods as described previously<sup>26</sup>. The sizes of isolated EVs were below 200 nm as  
105 measured by nanoparticle tracking analysis (NTA) (**Figure 2a** and **Figure S1**), and the  
106 concentration varied from  $10^{10}$  /mL to  $10^{12}$  /mL. The morphology of sEV was  
107 characterized by transmission electron microscopy (TEM), showing typical entire and  
108 saucer-like shapes (**Figure 2b**). According to the guidelines in minimal information for  
109 studies of extracellular vesicles 2018 (MISEV 2018)<sup>27</sup>, we found that three universal  
110 EV-positive plasma membrane proteins, Alix, CD63 and Tsg101 were positively  
111 expressed, and one EV-negative protein, Calnexin, was negatively expressed with  
112 western blot (**Figure 2c**).

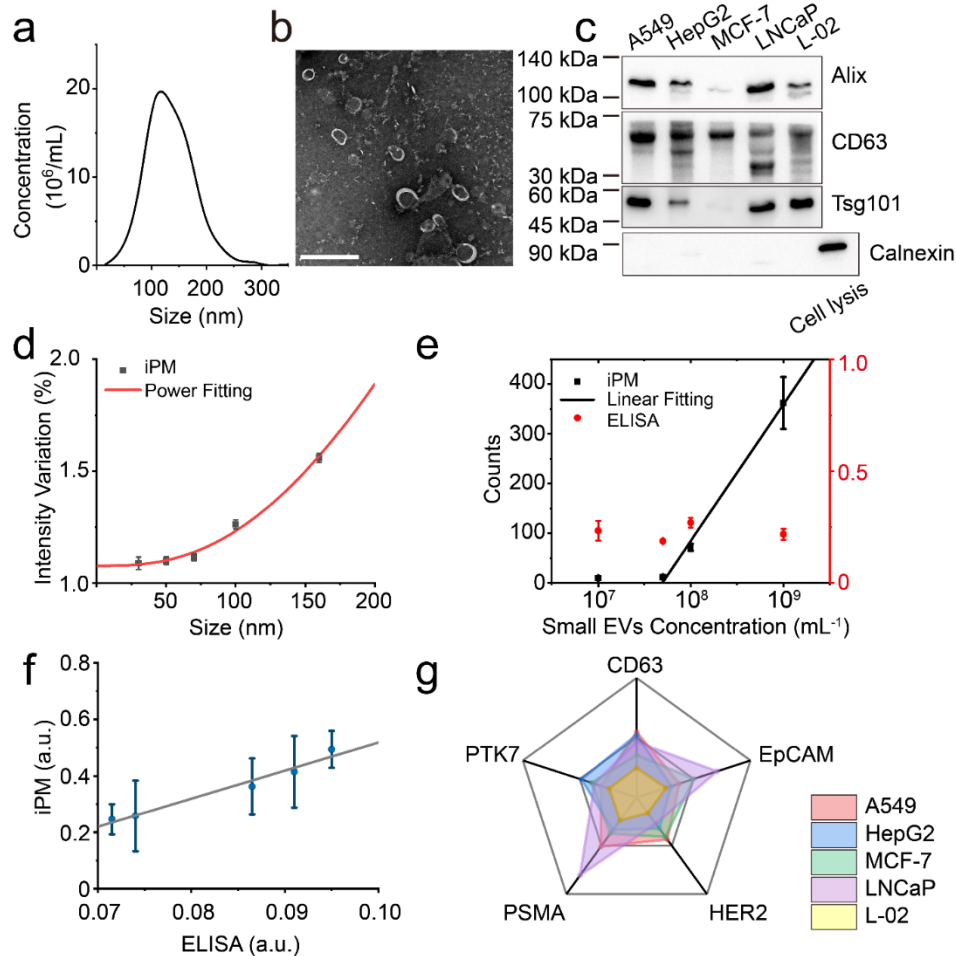

113

114 **Figure 2. Single sEV imaging and detection.** (a) Concentration and size distribution of A549-derived sEV measured by NTA. (b) Typical TEM images of sEV. (c) Western blot results of Alix, CD63, Tsg101 and Calnexin in sEV derived from A549, HepG2, MCF-7, LNCaP, L-02 cell lines. (d) Theoretical (red) and experimental (black) iPM intensities of silica nanoparticles of 30 nm, 50 nm, 70 nm, 100 nm, and 160 nm. (e) Sensitivity of iPM (black) and ELISA (red) for the detection of sEV from MCF-7 cells with CD63 aptamer -coated sensor chips. (f) CD-63 level on sEV of five cells lines determined by iPM and ELISA. (g) Radar plot showing iPM analyses of 5 EV protein markers from the five different cell lines (n = 3).

123

## 124 Plasmonic imaging and detection of sEV.

125 In SEVEN, the iPM system offers a unique approach to image and characterize single  
126 sEV. After binding onto the chips, sEV showed an intact morphology as characterized  
127 by scanning electron microscope (SEM) (**Figure S2**). We established the calibration  
128 curve between iPM intensity and particle sizes using silica nanoparticles (**Figure 2d**  
129 and **Figure S3**), and measured the sizes of sEV by intercalation. Using sEV samples  
130 from MCF-7 as an example, the number of EVs binding onto optimized HER2-aptamer

131 modified sensor surfaces (**Figure S4**) within 15 minutes correlated well with the  
132 concentrations of total sEV in the range from  $5 \times 10^7$  /mL to  $10^9$  /mL (**Figure 2e**). The  
133 specificity in measuring HER2-positive sEV was verified by comparing the binding on  
134 bull serum albumin (BSA)-coated surface and a dissociation experiment (**Figure S5**).  
135 Note that the conventional enzyme-linked immunosorbent assay (ELISA) failed to  
136 measure the HER2-positive sEV due to insufficient sensitivity.

137 Besides measuring the size and concentration, SEVEN could also report the average  
138 level of specific proteins in sEV samples. For sEV samples of the five cell lines at the  
139 concentration of  $2 \times 10^{10}$  /mL, we compared the CD63 expression levels measured by  
140 ELISA with the percentage of CD63-positive EVs in total EVs determined by iPM,  
141 which showed a good linear correlation ( $R^2 > 0.96$ , **Figure 2f**). Similarly, the expression  
142 levels of protein biomarkers in the sEV from five cell lines were measured as the  
143 percentage of target-specific EVs, which were largely different from each other (**Figure**  
144 **2g**). We note that the protein levels reported by SEVEN are not the expression level on  
145 single sEV, by related to the total proteins from the all sEV.

146

#### 147 **Limitations in cancer diagnosis by total sEV analysis.**

148 We then explored the capability of SEVEN in profiling proteins in total sEV population  
149 for cancer diagnosis, which is the common practice. 72 small EV samples were  
150 collected from the cancer cell lines of A549, HepG2, MCF-7 and LNCaP, and 18  
151 samples were collected from L-02 healthy liver cell lines as the control. The expression  
152 of the five biomarkers was first confirmed by Western blot (**Figure 2c** and **Figure S6**).  
153 Expression levels of CD63, EpCAM, HER2, PSMA and PTK7 in the small EV samples  
154 from the five cell lines were measured as the percentage of target-positive EVs in total  
155 EVs as described above (**Figure 3a**). The heterogeneity among different batches of  
156 small EV samples was obvious, which is inevitable due to the intrinsic variations in cell  
157 conditions and other environmental factors. The exponential coefficients related to the  
158 association rates were quantified, which were also heterogeneous among difference cell  
159 lines (**Figure 3b**).

160 sEV from the four cancer cell lines showed a significantly higher protein levels than  
 161 the healthy control from L-02 ( $p < 0.01$ , **Figure 3c**), indicating the potential to perform  
 162 cancer diagnosis with these biomarkers. But when performing the cancer classification  
 163 with the expression level and exponential coefficient of only one of the biomarkers,  
 164 none was able to classify all five cancers with  $p < 0.05$  (**Figure 3d**) in a pairwise  
 165 comparison. Even the well-recognized specific markers, such as HER2 and PSMA,  
 166 were not able to distinguish breast cancer and prostate cancer. When the expression  
 167 levels and exponential coefficients of all five biomarkers were analyzed with the Linear  
 168 Discriminant Analysis (LDA) algorithm used in previous study<sup>13</sup>, the overall average  
 169 classification accuracy was only 34% (**Figure 3e** and **Figure S10 c**). The areas under  
 170 the curve (AUC) were 0.74, 0.48, 0.64, 0.56 and 0.85 respectively, using receiver  
 171 operating characteristic (ROC) analysis (**Figure 3f**).  
 172

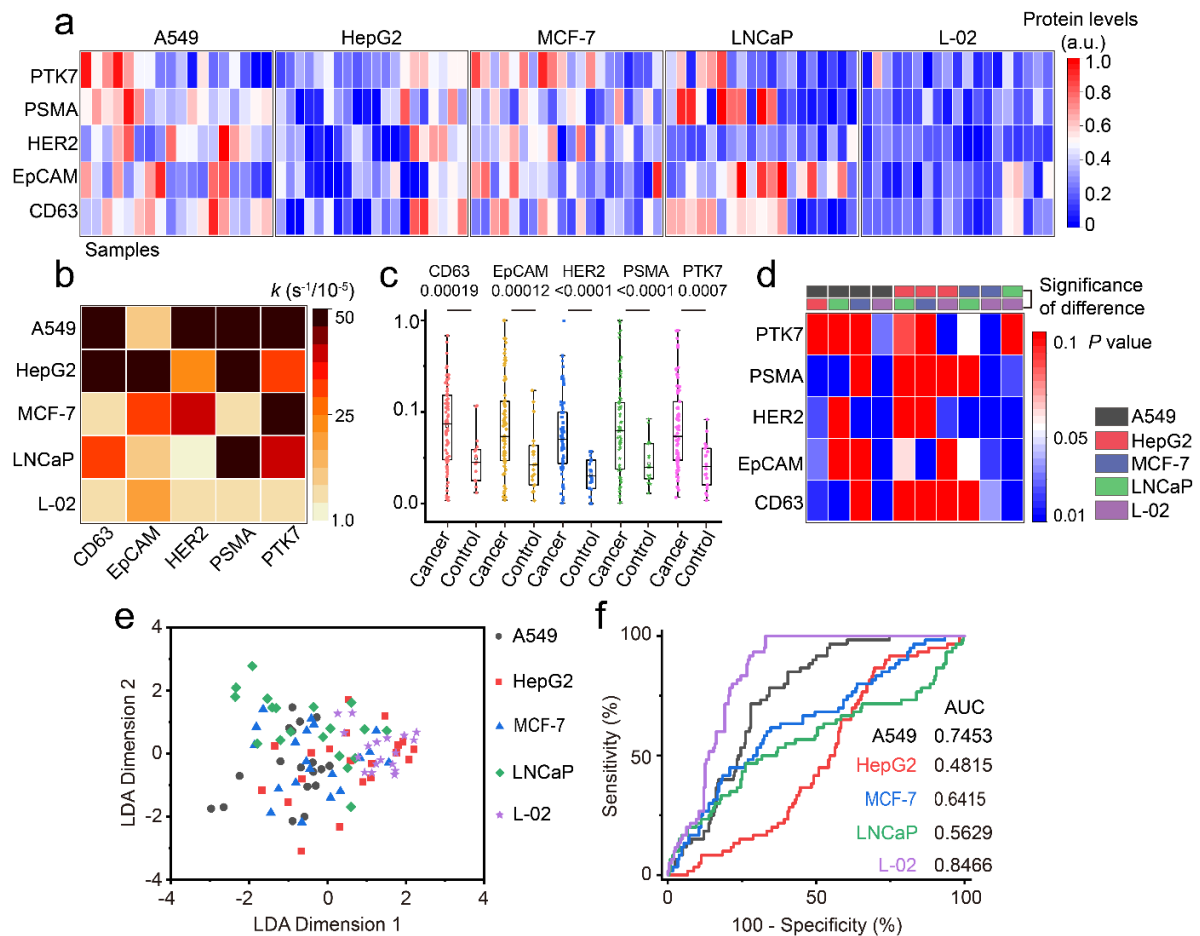

173

174 **Figure 3. Profiling total sEV surface protein markers.** (a) Heat map of sEV surface  
 175 protein in 5 cell lines (18 samples for each cancer cell line). (b) The association rates



176 of total sEV from five cell lines. (c) Elevated protein levels of all 5 protein markers in  
177 sEV derived from cancer cell lines ( $n = 78$ ; means  $\pm$  s.e.m.) than normal cell line  
178 ( $n = 18$ ; means  $\pm$  s.e.m.). (d) The statistical differences in distinguishing cancer types  
179 ( $n = 18$  samples for each cell type) by a single biomarker by independent samples t-test.  
180 (e) Cancer classification using five protein biomarkers of total sEV by LDA. (f) The  
181 ROC curves for cancer classification in (e).

182

183 These results suggest that using protein biomarkers in the mix population of sEV could  
184 lead to poor accuracy in the cancer diagnosis. One of the reasons could be due to the  
185 heterogeneity at the single EV level. For example, when examining the CD63 level in  
186 sEV from LNCaP cells using immunoelectron microscopy, different number of  
187 immuno-gold nanoparticles were observed on sEV (**Figure S7**). We then investigated  
188 the possibility to improve cancer diagnosis accuracy by exploring the protein  
189 heterogeneity at the subpopulation level.

#### 190 **Profiling protein heterogeneity in size-dependent subpopulations.**

191 The sEVs were empirically divided into three size-dependent subpopulations, including  
192 the sEV-S (30-70 nm), sEV-M (70-120 nm) and sEV-L (120-160 nm). With the single  
193 EVs imaging and sizing capability of iPM, the binding curves of three subpopulations  
194 were digitally plotted (**Figure 4a** and **Figure S8**). The exponential coefficients were  
195 obviously heterogeneous (**Figure 4b**). For example, the exponential coefficients were  
196 0.0070, 0.0091, and 0.0089  $s^{-1}$  for sEV-S, sEV-M and sEV-L binding with PSMA-  
197 aptamer, and 0.0013, 0.0015, and 0.0028  $s^{-1}$  with CD63-aptamer respectively, and  
198 LNCaP and L-02 derived sEV showed much faster binding rates than A549-derived  
199 sEV.

200



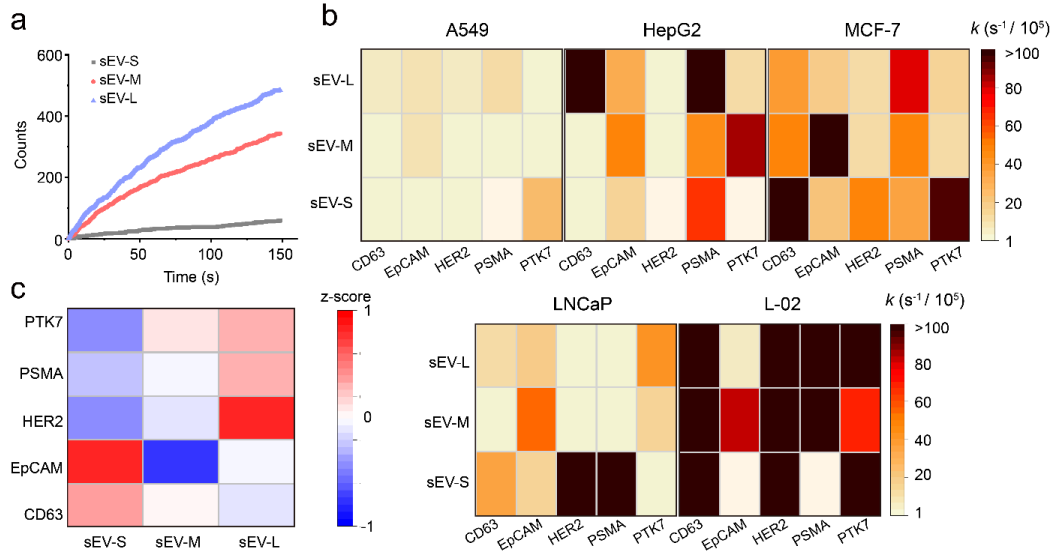

201

202 **Figure 4. Binding kinetics and distinct marker of size-dependent sEV's**  
 203 **subpopulations.** (a), An example of binding curves of LNCaP-derived sEV  
 204 subpopulations on PSMA-modified chips. (b), The heat map of apparent association  
 205 rate  $k$  of five kind of cell lines in five kind of aptamers-modified sensor chips. (c),  
 206 Heatmap illustration of the relative abundance of sEV (A549) markers in sEV-S, sEV-  
 207 M and sEV-L. Scale shown is protein levels subtracted by mean and divided by row  
 208 standard deviation (that is,  $\Delta$  (protein levels – mean)/s.d.).

209

210 We further calculate the z score of protein levels from the three subpopulations to  
 211 highlight the difference<sup>15</sup>. In sEV from all cell lines other than A549, all protein markers  
 212 were found to enrich in sEV-L (Figure S9). While for A549, EpCAM and CD63 were  
 213 mainly expressed in the sEV-S subpopulations, but HER2, PSMA and PTK7 in sEV-L  
 214 (Figure 4c). This confirms that membrane protein expression levels in sEV are not  
 215 directly proportional to membrane areas, but instead, they were packaged purposely.  
 216 The reason why specifically only EpCAM and CD63 from A549 cells were highly  
 217 expressed in sEV-S is still unknown. Note that the sEV-s population weighed only a  
 218 small portion of the total sEV (Figure 2a). Thus, when analyzing EpCAM and CD63  
 219 from the total sEV, the majority as sEV-M and sEV-L would give a large background  
 220 noise, which explains the poor accuracy in Figure 3d.

221

## 222 **Improving cancer classification accuracy with subset information.**

223 The multidimensional information matrixes of sEV, including the protein levels and  
 224 exponential coefficients of total sEV and those of three subpopulations were input into

225 a LDA model to discriminate the five cell lines (**Figure 5a**). Using the same raw data  
 226 and similar LDA algorithms in **Figure 3e**, the overall classification accuracy  
 227 significantly improved to 70% (**Figure 5b, 5c**), with the AUC of 0.97, 0.85, 0.85, 0.97  
 228 and 0.82 for the five cell lines, respectively (**Figure 5d**). Precision Recall Curves (PRC)  
 229 also showed a better performance of classification with subset information comparing  
 230 to that without subset information to differentiate cancer cell lines (**Figure S10a, b**).  
 231 Classification patterns of the HepG2 liver cancer cell line and the L-02 healthy liver  
 232 cell line largely overlapped, but discrimination between cancer cell lines from different  
 233 origins was reliable. When we combine the data of HepG2 and L-02 into a same group,  
 234 the average accuracy was improved to over 81% (**Figure S10d**).

235

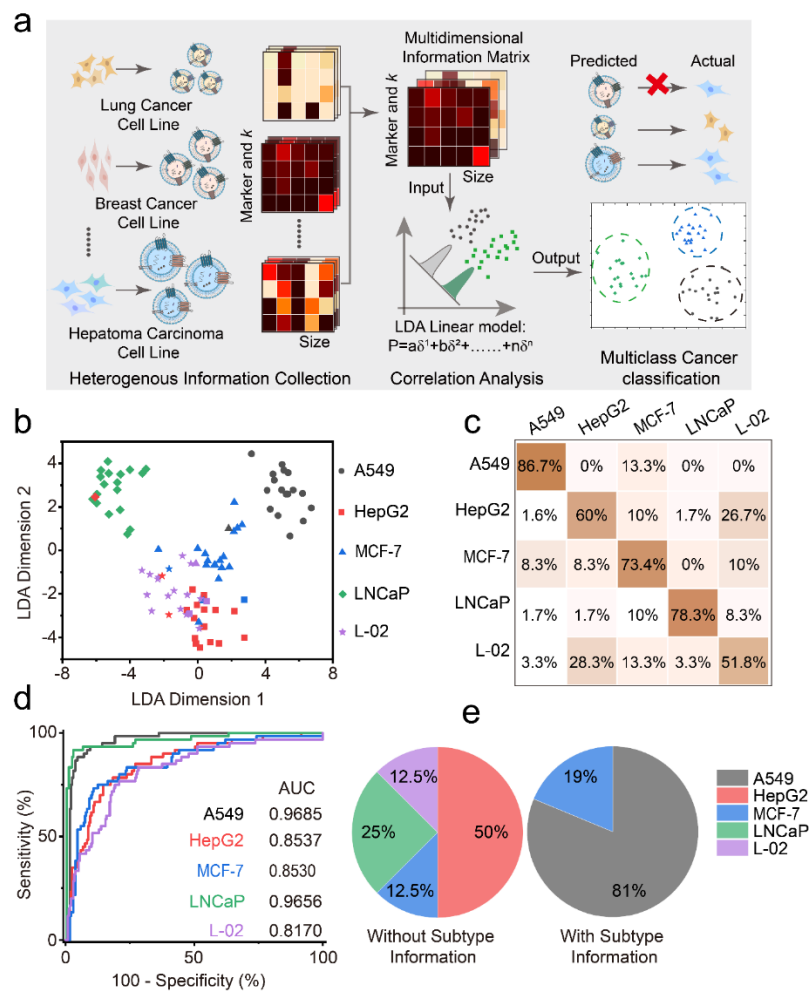

236  
 237  
 238  
 239

**Figure 5. Multiclass cancer classification with subset information.** (a) The workflow of SEVEN-based cancer classification with subset information. (b) The classification results by including subset information into Fig.3e. (c) Probability matrix

240 summarizing the cancer classification results in (b). (d) ROC curves of (c). (e) Results  
241 in determining the origin of A549 derived sEV spiked in human serum samples.

242

243 We further performed simple validation experiments by spiking sEV derived from  
244 A549 cell lines into EV-depleted serum samples, and determined their origin with  
245 SEVEN. The ratio of success reached 81% (**Figure 5e**) with the information at the size-  
246 dependent subpopulations, while without this information none was correctly classified.  
247 This indicates the potential of SEVEN in analyzing sEV in complicated samples for  
248 future clinical applications.

### 249 **Re-defining the size-dependent subsets of sEV.**

250 Simply dividing the sEV into as small, medium and large subsets is intuitive but brutal,  
251 both in previous work by isolating the subsets and in this work by empirically setting  
252 thresholds. There has been little evidence showing why the membrane proteins and  
253 contents should be packed in such a simple size-dependent manner. A deeper study is  
254 hindered by the capability to isolate the sEV subsets within narrower size ranges.  
255 However, in SEVEN, the iPM system offers a sizing accuracy of 10 nm, which provides  
256 the opportunity to potentially address this problem. We thus re-calculated the SEVEN  
257 data between 30 to 160 nm as thirteen subgroups at the interval of 10 nm. Instead of  
258 empirically combining some of the subgroups, we developed an artificial intelligent  
259 algorithm to automatically search for the optimal size partition to achieve the best  
260 classification accuracy (Figure S11). The results show that when the sEV were grouped  
261 by sizes within 30-40 nm, 40-100 nm, 100-110 nm, 110-130 nm, 130-140 nm and 140-  
262 160 nm, the classification accuracy with raw data in Figure 5 dramatically increased to  
263 87% (**Figure 6**). Besides, the healthy liver cell line L-02 was fully separated from  
264 cancerous cell lines.

265

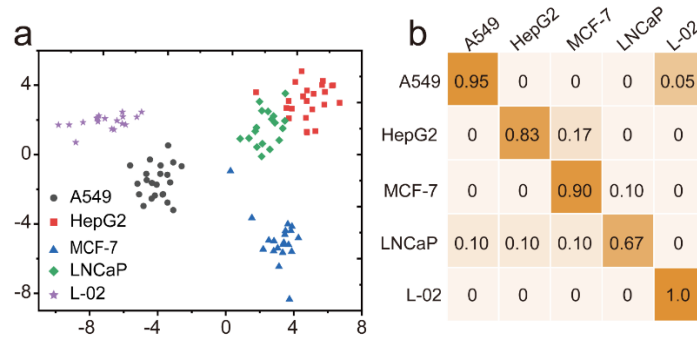

266

267 **Figure 6 Multiclass cancer classification by re-grouping the subsets.** (a) The  
268 classification results of five cell lines with raw data in Figure 5. (b) Probability matrix  
269 summarizing the cancer classification results in (a).

## 270 Discussion

271 We have presented the single EV enumerating (SEVEN) approach to explore the in-  
272 depth information of size-dependent heterogeneity of sEV. Benefits from the single  
273 particle imaging and detection capability, SEVEN circumvents the challenges in precise  
274 isolation of subpopulations. Studies on five cell lines and five protein biomarkers have  
275 provided new evidence in the correlation between the protein levels and the size  
276 distribution of sEV. Experiments with sEV from cancer cell lines and those spiked in  
277 serum samples show that SEVEN could effectively improve the diagnostic accuracy  
278 over ensemble measurements. This work thus has highlighted the importance to explore  
279 the underlying relationship between different dimensions of heterogeneity of sEV for  
280 developing better diagnostic performance. On the meantime, there are still several  
281 limitations in the present work. First, the correlation between size and membrane  
282 proteins was obtained in a protein-by-protein manner, which is not ideal for this  
283 application. This could be improved by combining the total internal reflection  
284 fluorescence mode<sup>28, 29</sup> and the iPM mode to simultaneously detect multiple membrane  
285 proteins and sizes at the single sEV level. Second, this work presented the first proof-  
286 of-concept study with cell lines and spiked samples. Further validation with clinical  
287 samples will be required to evaluate its potential in cancer diagnosis, which is currently  
288 undergoing.

289

## 290 **Materials and Methods**

291 **iPM system.** The iPM system was built on an inverted total internal reflection  
292 fluorescence microscope (TIRFM) (Olympus IX83) using a 60 × oil immersion  
293 objective (N.A. = 1.49). The surface plasmons were stimulated via Kreschmenn  
294 configuration by a laser beam at 637 nm (OBIS 637 nm LX FP 100 mW) at a highly  
295 inclined incident angle close to SPR dip angle. The real-time images of sEV were  
296 recorded by a sCMOS camera (Prime TM; Photometrics). A motorized XY stage (Ludl  
297 Electronic Products, Ltd.) was incorporated on the microscope to translate the sensor  
298 chip.

299 **iPM sensor chips and surface modifications.** The sensor chips were 12-542-B  
300 (Thermo Fisher) glass coverslips coated with 3 nm of chromium and 47 nm of Au. The  
301 chips were cleaned first with deionized water and ethanol for three times, and dried by  
302 nitrogen gas. After a quick hydrogen flame treatment, the sensor chip was immediately  
303 immersed in modification buffer for 12 h. The modification buffer contained 1 μM  
304 aptamer (Sangon Biotech, China) 5 μM Tris (2-carboxyethyl) phosphine (TCEP, Sigma)  
305 and 1 μM 6-Mercapto-1-Hexanol (MCH, Sigma). The chip was rinsed for three times  
306 with 1× PBS buffer to remove unbound aptamers, and 50 μL of bull serum albumin  
307 (BSA, Sigma) solution (1% w/v) was added to further block the residual active sites for  
308 5 min. For positive-charge modification, the chip was treated with hydrogen flame and  
309 immediately submerged in 10 mM HS-PEG-NH<sub>2</sub> (10,000 Da; Nanocs) water/ethanol  
310 (1:1) solution overnight.

311 **Image processing.** The iPM images were processed offline with MATLAB R2018a  
312 (MathWorks). Raw images were preprocessed by moving average with  $n = 10$  frames.  
313 The differential images between two adjacent average images were reconstructed with  
314 home-developed codes. Briefly, by calculating the radius and center of the ring in  $k$   
315 space, the wave vector of single sEV was determined. Deconvolution was done in  $k$   
316 space using the point-spread function obtained experimentally, by aligning 30  
317 individual images of 100-nm silica nanoparticles to the maximum intensity point, and

318 averaging after alignment. Then average intensity of the  $3 \times 3$  pixels around the  
319 brightest pixel of particle images was calculated as the particle intensity.

320 **Size calibration.** Silica nanoparticles (MikroNano Partikel GmbH) with the size of 30  
321 nm, 50 nm, 70 nm, 100 nm and 160 nm were used to build the size-calibration curve.  
322 Raw silica nanoparticles were diluted with  $1 \times$  PBS at 1:1000 vol/vol, and ultrasonicated  
323 for 30 min to redisperse the single particles followed by centrifuging at 2000 rpm to  
324 remove aggregates. 20  $\mu$ L of nanoparticle solution was injected onto the positive-charge  
325 modified sensor chips, and images were recorded for 2 min at 100 fps. Each experiment  
326 was repeated in triplicates. The statistical histograms of silica nanoparticles were fitted  
327 with a Gaussian function to determine the peak intensity values (mean  $\pm$  SD,  $n > 150$ )  
328 (Supplementary Fig. 4). The calibration curve was plotted as the intensity versus the  
329 diameter of silica nanoparticles (Fig. 2f).

330 **Cell culture.** The human lung cancer cell line (A549, ATCC), hepatoma cell line  
331 (HepG2, ATCC), breast cancer cell line (MCF-7, ATCC), and normal liver cell line (L-  
332 02, ATCC) were cultured using high-glucose Dulbecco's modified Eagle's medium  
333 (DMEM) (Hyclone) with 10% extracellular-vesicle-free fetal bovine serum (EV-free  
334 FBS) (SeraPro) and 1% penicillin - streptomycin (Gibco). Prostate cancer cell line  
335 (LNCaP, ATCC) was cultured in Roswell Park Memorial Institute 1640 (PRMI-1640)  
336 (Hyclone) with 10% EV-free FBS (SeraPro) and 1% penicillin-streptomycin (Gibco).  
337 Cells were cultured at 37 °C with 5% CO<sub>2</sub> in a humidified incubator (Thermo Fisher  
338 Scientific). The cells were incubated in the T75 flask (Corning) with 30% confluent and  
339 the culture medium was collected after 48 h culture when the cells were 70%-80%  
340 confluent.

341 **Isolation of small extracellular vesicles.** sEV were isolated based on differential  
342 centrifugation. Cell culture media (300 mL) was first centrifuged at 500g for 5 min,  
343 followed by centrifugation at 2,000g for 45 min to remove cells. The treated medium  
344 was centrifuged at 10,000g for 60 min. Then the supernatant was filtrated by 0.22  $\mu$ m  
345 membrane filtration (Millipore). Finally, the filtrate was ultracentrifuged at 100,000g

346 for 120 min. The sEV were washed by 50 mL 1× phosphate buffer saline (PBS,  
347 Hyclone), followed by ultracentrifugation at 100,000g for 120 min. The purified sEV  
348 were resuspended in 50 uL 1× PBS.

349 **Spiking test in human serum.** Human serum sample was collected from three healthy  
350 volunteers with agreements at the Shanghai Sixth People's Hospital. Total volumes of  
351 1 mL of clinical serum samples were first centrifuged at 2000g, and filtered through  
352 0.22 μm pore filter (Millipore), then ultrafiltrated by 100 kDa ultrafiltration membrane  
353 (Millipore) at 10,000g at 4 °C for 20 min. The EV-depleted serum was stored at -80 °C  
354 before use. 10 uL A549 derived sEV was added to 90 uL EV-depleted serum to mimic  
355 the real cancer-related serum with the final EV's concentration of  $10^{10}$  / mL.

356 **NTA analysis.** The size distribution of sEV samples were characterized by NTA  
357 (Particle tracking analyzer; Particle Metrix, PMX). All samples were diluted using PBS  
358 to  $\sim 10^7$  particles mL<sup>-1</sup> before measurements. The data of size distribution were  
359 analyzed with NTA software. The measurements were conducted at 25 °C.

360 **TEM.** 10 μL sEV sample ( $\sim 10^{12}$  particles mL<sup>-1</sup>) were directly absorbed on  
361 Formvar/carbon-coated copper grids for two minutes. After blotting residual samples  
362 with filter paper, 10 μL 1% phosphotungstic acid was dropped to stain sEV for 45  
363 seconds followed by blotting the phosphotungstic acid with filter paper. After drying at  
364 room temperature, the grids containing sEV were observed on Tecnai G2 spirit Biotwin  
365 TEM (FEI) at 80 kV. For immunogold labeling of sEV sample derived from LNCaP,  
366 CD63 aptamer-conjugated gold nanoparticles were incubated with sEV samples for 30  
367 min at 4 °C, and the samples were dropped in grids for TEM detection. 10 uL CD63  
368 aptamer (1uM) was mixed with 100 uL gold nanoparticles (4 ~ 10 nm, 2 mg/mL) at  
369 4 °C for 12 h to prepare CD63 aptamer-conjugated gold nanoparticles, followed by  
370 blocking active sites with BSA solution (1% w/v).

371 **Immunoblot analysis of sEV samples.** Isolated sEV samples and cells were treated  
372 with radio immunoprecipitation assay (RIPA) lysis buffer including protease inhibitors



373 (Beyotime) with an ice bath for 30 min, followed by quantifying with a BCA assay.  
374 Protein lysates were separated by sodium dodecyl sulfate-polyacrylamide gel  
375 electrophoresis (SDS-PAGE), followed by transferring to polyvinylidene fluoride  
376 (PVDF) membrane. The transferred PVDF membranes were blocked using 5% non-fat  
377 dry milk in TBST buffer (TBS powder, Servicebio, 0.05% Tween-20) at room  
378 temperature for 1 h. Then blocked membranes were immunoblotted with a panel of  
379 primary antibodies including anti-Alix (Santa Cruz, sc-7964), anti-Tsg101 (Santa Cruz,  
380 sc-7964), anti-Calnexin (Abcam, ab133615), anti-CD63 (NOVUS, NBP2-4225B), anti-  
381 PTK7 (BBI, D199285-0100), anti-PSMA (Abcam, ab79542), anti-HER-2 (Abcam,  
382 ab134190), anti-EpCAM (BBI, D263391) overnight at 4 °C. Followed by incubating  
383 with corresponding HRP-conjugated secondary antibody for 1 h at 37 °C, the  
384 membranes were washed three times for 10 min at room temperature with TBST buffer.  
385 Finally, the western blot images were recorded on a gel image system (Tanon).

386 **Data analysis.** The expression levels of target markers were defined by normalizing  
387 the target-associated number recorded to those of total number of sEV. The total  
388 number of sEV was measured by counting the number of sEV binding to the positive-  
389 charged sensor surfaces. The protein levels of total sEV and three small-EVs subtypes  
390 were normalized by subtracting the 2.5th percentile value and dividing by (97.5th  
391 percentile value–2.5th percentile value). These normalized data were directly used for  
392 LDA-based classification. Z-score were calculated by protein levels subtracted by mean  
393 and divided by row standard deviation. The significance of the difference between the  
394 sEV from cancer cell lines and normal cell line using individual protein marker was  
395 calculated using a two-tailed, heteroscedastic t-test (**Fig. 3c**). The significance of the  
396 difference between the sEV from five cell lines using individual protein marker was  
397 calculated using a two-tailed, heteroscedastic

#### 398 **The artificial intelligence algorithm.**

399 The artificial intelligence algorithm developed here is based on Python 3.7. Because  
400 the sizing accuracy of iPM system is 10 nm, the data of SEVEN between 30 to 160 nm  
401 were re-calculated into thirteen subgroups at the interval of 10 nm. Theoretically, there

402 are totally  $2^{12}$  possibilities of subsets we can choose. Hill climbing algorithm was a  
403 random local search optimization algorithm for nonlinear objective functions, which  
404 was used to search for the locally optimal solution. Basically, hill climbing algorithm  
405 includes the following steps. 1) a group of subsets was randomly set as the initial point  
406 and its classification accuracy calculated by LDA was set as current best solution. 2)  
407 the next new point was defined by the greedy strategy of hill climbing algorithm. And  
408 the new classification accuracy was obtained. 3) the new classification accuracy was  
409 compared with the previous one. If the new classification accuracy was equal to or  
410 bigger than the previous one, the former point was abandoned and the latter was set as  
411 the current point, and vice versa. Then repeat step 2 and step 3 to quickly find the  
412 optimal solution.

413

#### 414 **Acknowledgements**

415 **Funding:** This work was funded by the National Natural Science Foundation of China  
416 (Grants 61901257 and 61805136) and the National Major Scientific Research  
417 Instrument Development Program (Grant 22027807) for financial support.

418 **Author contributions:** H.Y. and Y.Y. conceived the idea; C.Z. and Y.Y. performed  
419 the experiments; C.Z. and F.X. analyzed data; W.Z., Q.Z., J.W. and X.D. helped with  
420 instrumentation; H.H. and X.D. provided samples and helped with discussion; C.Z. and  
421 H.Y. wrote the paper.

422 **Competing interest:** The authors declare no competing interest.

423

424

#### 425 **References**

- 426 1. van Niel, G., D'Angelo, G. & Raposo, G. Shedding light on the cell biology of  
427 extracellular vesicles. *Nat Rev Mol Cell Biol* **19**, 213-228 (2018).
- 428 2. LeBleu, V.S. & Kalluri, R. Exosomes as a multicomponent biomarker platform  
429 in cancer. *Trends Cancer* **6**, 767-774 (2020).
- 430 3. Mathieu, M., Martin-Jaular, L., Lavieu, G. & Thery, C. Specificities of secretion  
431 and uptake of exosomes and other extracellular vesicles for cell-to-cell  
432 communication. *Nat Cell Biol* **21**, 9-17 (2019).
- 433 4. Thery, C., Zitvogel, L. & Amigorena, S. Exosomes: composition, biogenesis  
434 and function. *Nat Rev Immunol* **2**, 569-579 (2002).
- 435 5. Hoshino, A. et al. Tumour exosome integrins determine organotropic metastasis.

- 436 *Nature* **527**, 329-335 (2015).
- 437 6. Wortzel, I., Dror, S., Kenific, C.M. & Lyden, D. Exosome-mediated metastasis:  
438 communication from a distance. *Dev Cell* **49**, 347-360 (2019).
- 439 7. Gyuris, A. et al. Physical and molecular landscapes of mouse glioma  
440 extracellular vesicles define heterogeneity. *Cell Rep* **27**, 3972-3987 (2019).
- 441 8. Hoshino, A. et al. Extracellular vesicle and particle biomarkers define multiple  
442 human cancers. *Cell* **182**, 1044-1061 e1018 (2020).
- 443 9. Kalluri, R. & LeBleu, V.S. The biology, function, and biomedical applications  
444 of exosomes. *Science* **367** (2020).
- 445 10. Giulietti, M. et al. Exploring small extracellular vesicles for precision medicine  
446 in prostate cancer. *Front Oncol* **8**, 221 (2018).
- 447 11. Whiteside, T.L. Validation of plasma-derived small extracellular vesicles as  
448 cancer biomarkers. *Nat Rev Clin Oncol* **17**, 719-720 (2020).
- 449 12. Liu, C. et al. lambda-DNA- and aptamer-mediated sorting and analysis of  
450 extracellular vesicles. *J Am Chem Soc* **141**, 3817-3821 (2019).
- 451 13. Tian, F. et al. Protein analysis of extracellular vesicles to monitor and predict  
452 therapeutic response in metastatic breast cancer. *Nat Commun* **12**, 2536 (2021).
- 453 14. Liu, C. et al. Low-cost thermophoretic profiling of extracellular-vesicle surface  
454 proteins for the early detection and classification of cancers. *Nat Biomed Eng* **3**,  
455 183-193 (2019).
- 456 15. Zhang, H. et al. Identification of distinct nanoparticles and subsets of  
457 extracellular vesicles by asymmetric flow field-flow fractionation. *Nat Cell Biol*  
458 **20**, 332-343 (2018).
- 459 16. Bordanaba-Florit, G., Royo, F., Kruglik, S.G. & Falcon-Perez, J.M. Using  
460 single-vesicle technologies to unravel the heterogeneity of extracellular vesicles.  
461 *Nat Protoc* **16**, 3163-3185 (2021).
- 462 17. Kowal, J. et al. Proteomic comparison defines novel markers to characterize  
463 heterogeneous populations of extracellular vesicle subtypes. *Proc Natl Acad Sci*  
464 *U S A* **113**, E968-977 (2016).
- 465 18. Zheng, H. et al. Deconstruction of heterogeneity of size-dependent exosome  
466 subpopulations from human urine by profiling *N*-glycoproteomics and  
467 phosphoproteomics simultaneously. *Anal Chem* **92**, 9239-9246 (2020).
- 468 19. Guan, S. et al. Size-dependent sub-proteome analysis of urinary exosomes. *Anal*  
469 *Bioanal Chem* **411**, 4141-4149 (2019).
- 470 20. Wu, M. et al. Isolation of exosomes from whole blood by integrating acoustics  
471 and microfluidics. *Proc Natl Acad Sci U S A* **117**, 28525 (2020).
- 472 21. Zhang, H. & Lyden, D. Asymmetric-flow field-flow fractionation technology  
473 for exosome and small extracellular vesicle separation and characterization.  
474 *Nature Protocols* **14**, 1027-1053 (2019).
- 475 22. Chen, Y. et al. Exosome detection via the ultrafast-isolation system: EXODUS.  
476 *Nat Methods* **18**, 212-218 (2021).
- 477 23. Hendrix, A. The nature of blood(y) extracellular vesicles. *Nat Rev Mol Cell Biol*  
478 **22**, 243 (2021).
- 479 24. Yang, Y. et al. Interferometric plasmonic imaging and detection of single

- 480           exosomes. *Proceedings of the National Academy of Sciences* **115**, 10275-10280  
481           (2018).
- 482   25.   Yang, Y., Zhai, C., Zeng, Q., Khan, A.L. & Yu, H. Multifunctional detection of  
483           extracellular vesicles with surface plasmon resonance microscopy. *Analytical*  
484           *Chemistry* **92**, 4884-4890 (2020).
- 485   26.   Thery, C., Amigorena, S., Raposo, G. & Clayton, A. Isolation and  
486           characterization of exosomes from cell culture supernatants and biological  
487           fluids. *Curr Protoc Cell Biol* **Chapter 3**, Unit 3 22 (2006).
- 488   27.   Thery, C. et al. Minimal information for studies of extracellular vesicles 2018  
489           (MISEV2018): a position statement of the International Society for  
490           Extracellular Vesicles and update of the MISEV2014 guidelines. *J Extracell*  
491           *Vesicles* **7**, 1535750 (2018).
- 492   28.   Zhou, S. et al. Accurate cancer diagnosis and stage monitoring enabled by  
493           comprehensive profiling of different types of exosomal biomarkers: surface  
494           proteins and miRNAs. *Small* **16**, e2004492 (2020).
- 495   29.   Xiao, X. et al. Intelligent Probabilistic System for Digital Tracing Cellular  
496           Origin of Individual Clinical Extracellular Vesicles. *Anal Chem* **93**, 10343-  
497           10350 (2021).
- 498
